# Supplementary material for: Carbonic Anhydrase IX Promotes Human Cervical Cancer Cell Motility by Regulating PFKFB4 Expression
Source: PubMed Central journal article supplement (PMC7967120; doi:10.3390/cancers13051174), 2021-03-09

# Carbonic anhydrase IX promotes human cervical cancer cell motility by regulating PFKFB4 expression

Min-Chieh Hsin<sup>1,2</sup>, Yi-Hsien Hsieh<sup>1,2</sup>, Yi-Hsuan Hsiao<sup>1,3,4</sup>, Pei-Ni Chen<sup>1,2</sup>, Po-Hui Wang<sup>1,3,5,\*</sup>, and Shun-Fa Yang<sup>1,2,\*</sup>

<sup>1</sup>Institute of Medicine, Chung Shan Medical University, Taichung 402, Taiwan; [sinmusha@hotmail.com](mailto:sinmusha@hotmail.com) (M.C.H.); [hyhsien@csmu.edu.tw](mailto:hyhsien@csmu.edu.tw) (Y.H.H.); [54315@cch.org.tw](mailto:54315@cch.org.tw) (Y.H.H.); [peini@csmu.edu.tw](mailto:peini@csmu.edu.tw) (P.N.C.); [wang082160@gmail.com](mailto:wang082160@gmail.com) (P.H.W.)

<sup>2</sup>Department of Medical Research, Chung Shan Medical University Hospital, Taichung 402, Taiwan; [ysf@csmu.edu.tw](mailto:ysf@csmu.edu.tw)

<sup>3</sup>School of Medicine, Chung Shan Medical University, Taichung 402, Taiwan

<sup>4</sup>Department of Obstetrics and Gynecology, Changhua Christian Hospital, Changhua 500, Taiwan

<sup>5</sup>Department of Obstetrics and Gynecology, Chung Shan Medical University Hospital, Taichung 402, Taiwan

\*Correspondence: [wang082160@gmail.com](mailto:wang082160@gmail.com) (P.H.W.) and [ysf@csmu.edu.tw](mailto:ysf@csmu.edu.tw) (S.F.Y.)

Table S1. List of mRNA microarray identified genes upregulation and downregulation for CAIX overexpression in the SiHa cell line and CAIX-silencing in the Caski cell line.

| <b>Gene symbol</b> | <b>Caski siCAIX/scramble</b> | <b>SiHa CAIX/pcDNA3.0</b> |
|--------------------|------------------------------|---------------------------|
|                    | <b>Log2 (fold change)</b>    | <b>Log2 (fold change)</b> |
| GLS                | 1.73512642103292             | -0.521915467770771        |
| CEP170P1           | 1.17684356410596             | -0.567037824996468        |
| EHF                | 1.03820776833435             | -0.575610485652121        |
| PLS3               | 0.867966045787852            | -0.436274899151899        |
| UBXN7              | 0.828502543242875            | -0.477269305615549        |
| APH1B              | 0.813555693876334            | -0.480030100260504        |
| FAM49B             | 0.726671671098768            | -0.530662320369936        |
| PABPC3/PABPC1      | 0.687738816669596            | -0.533717248494197        |
| Histone genes*     | 0.67895508734665             | -0.545665204019582        |
| HSPG2              | 0.659852366412425            | -0.416535799774465        |
| CCND1              | -0.577961962283008           | 0.53325818128498          |
| PFKFB4             | -0.620813529189314           | 0.642339799306373         |
| TMEM158            | -0.660756841062532           | 0.549518132354652         |
| TRIM21             | -0.722670242612071           | 0.542338073785298         |
| CHAC1              | -0.751543587877312           | 0.597887631108036         |
| OSGIN1             | -0.979835289667423           | 0.418088831056177         |
| RETNLB             | -0.999069240049108           | 0.793512907154393         |
| ACSS2              | -1.08871707710427            | 0.576172665509403         |
| SERPINE1           | -1.24784413650027            | 0.535493380466762         |
| CA9                | -4.00385528804701            | 3.56711399351252          |

\*Histone genes: HIST2H2BF, HIST1H2BN, HIST1H2BE, HIST1H2BK, HIST1H2BL, HIST2H2BC, HIST1H2BI, HIST2H2BA, HIST1H2BC, HIST1H2BJ, HIST1H2BD, HIST3H2BB, HIST1H2BO, HIST1H2BH, HIST1H2BM

Figure S1: The original blot images of Figures.

Figure 1A

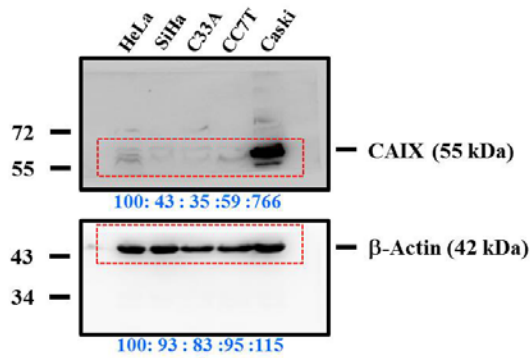

Figure 1B

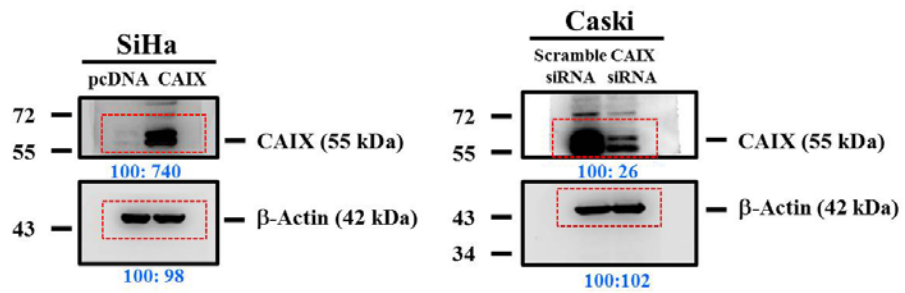

Figure 2D

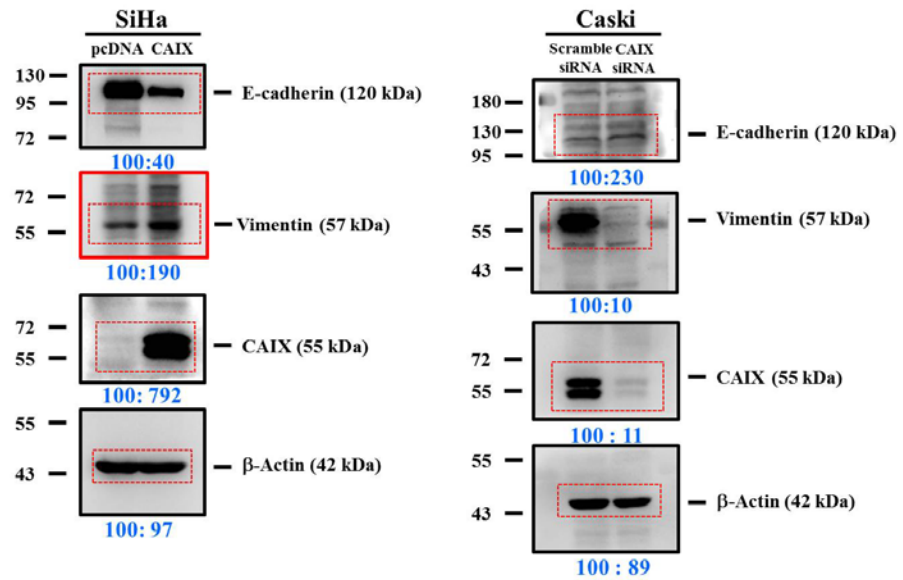

Figure 3C

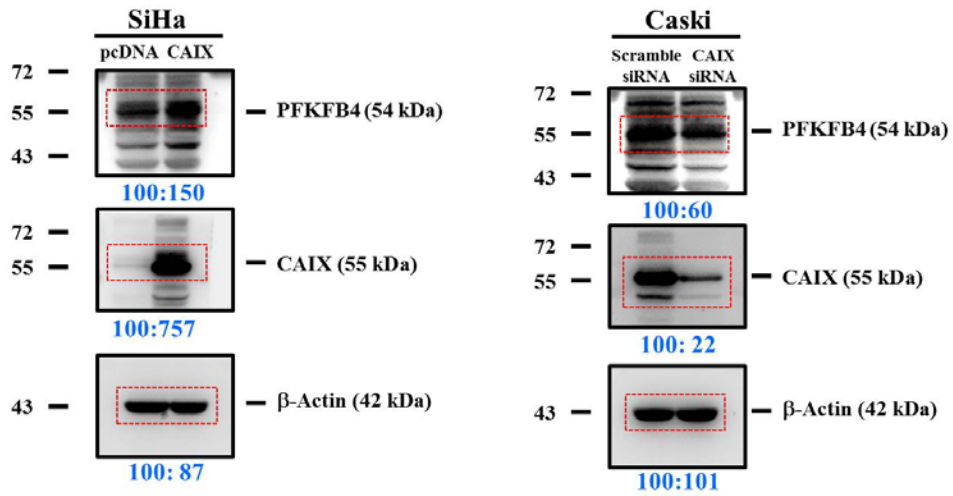

Figure 3D

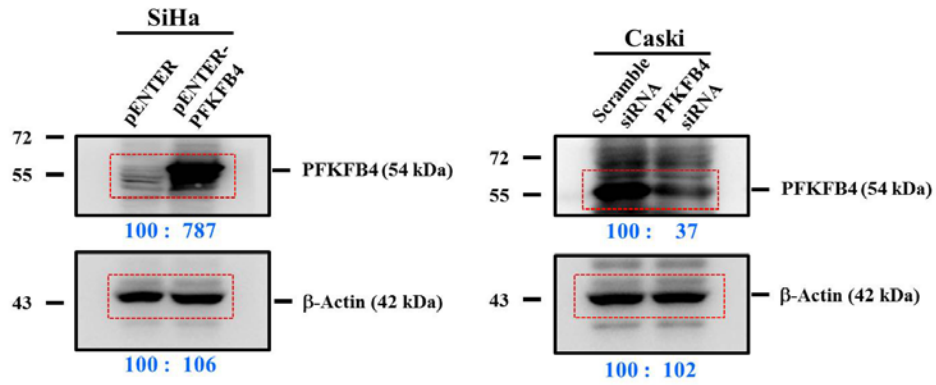

Figure 3F

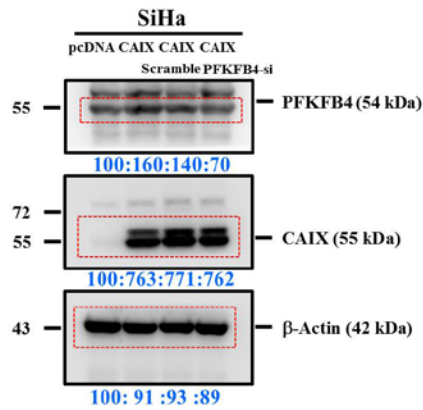

Figure 3H

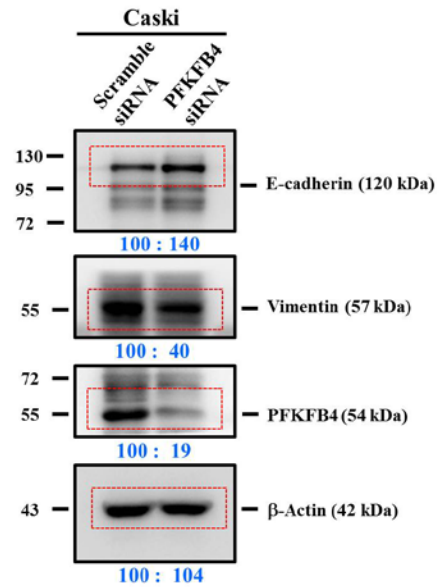

Figure 4A

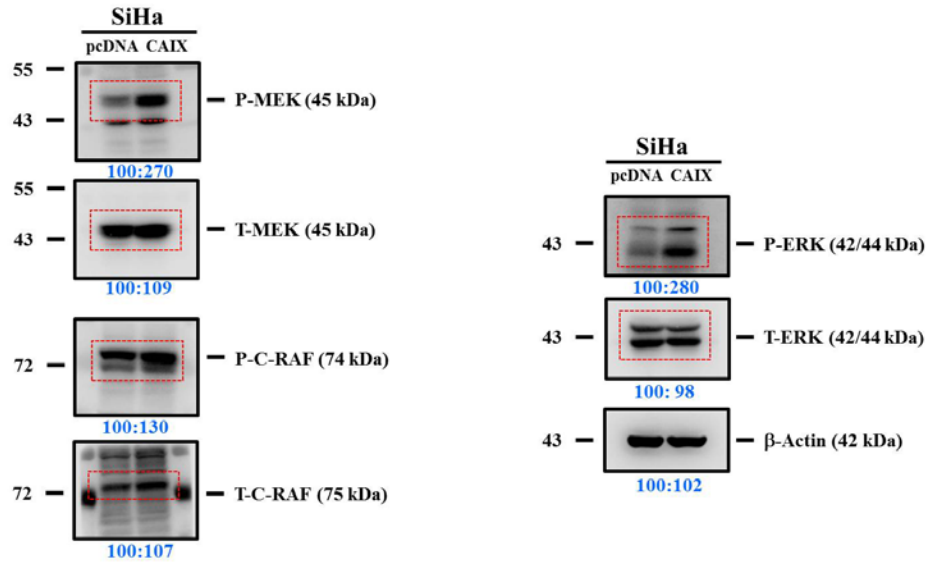

Figure 4A

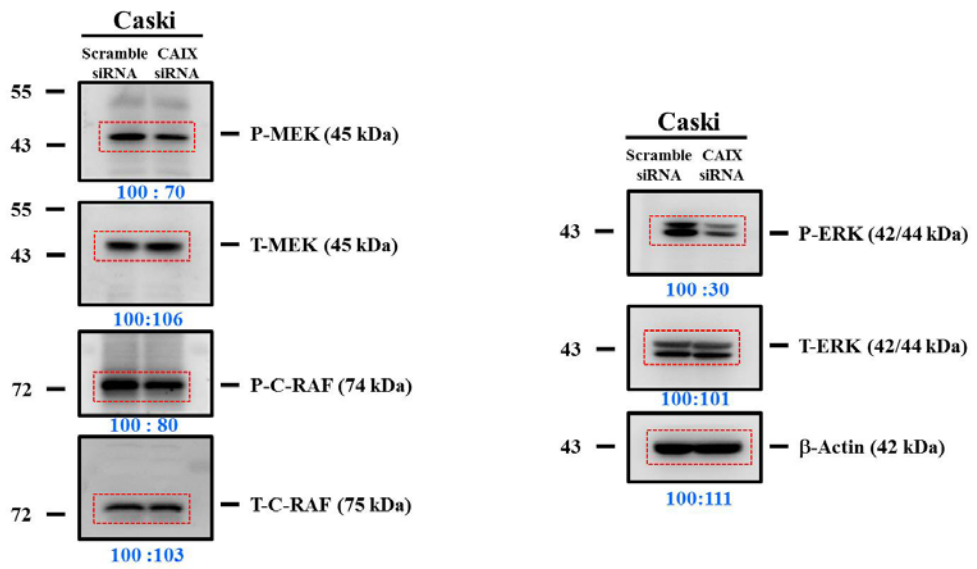

Figure 4B

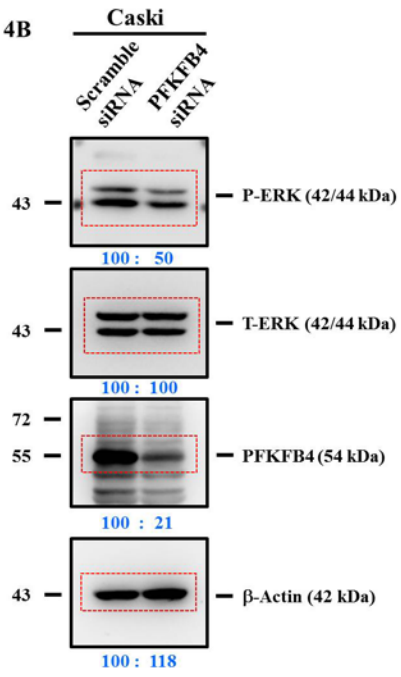

Figure 4D

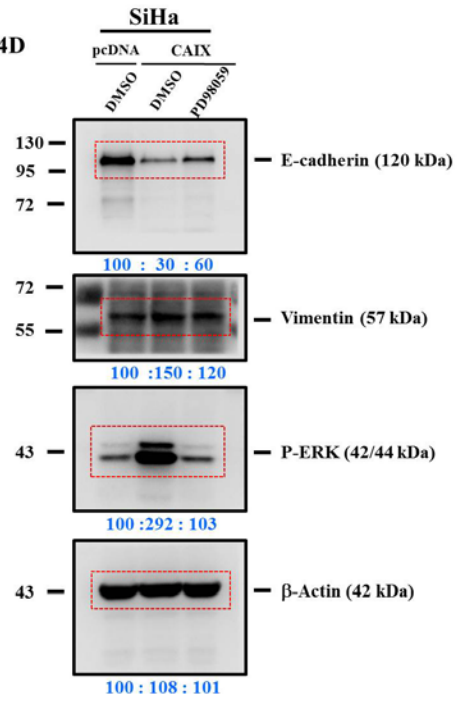

Supplement: cancers-13-01174-s001.pdf [file cancers-13-01174-s001.pdf]
